# Supplementary material
Source: publisher figshare collection journal article supplement (https://tandf.figshare.com/articles/dataset/_/1452913)

Figure S9

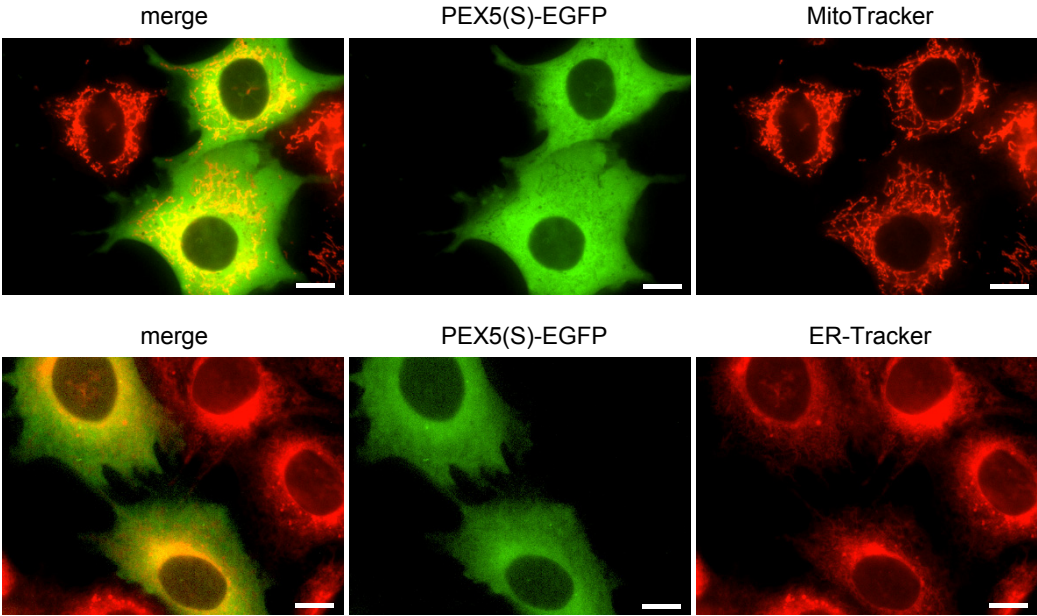

Supplement: Supplementary file 1 [file 8]

Figure S14

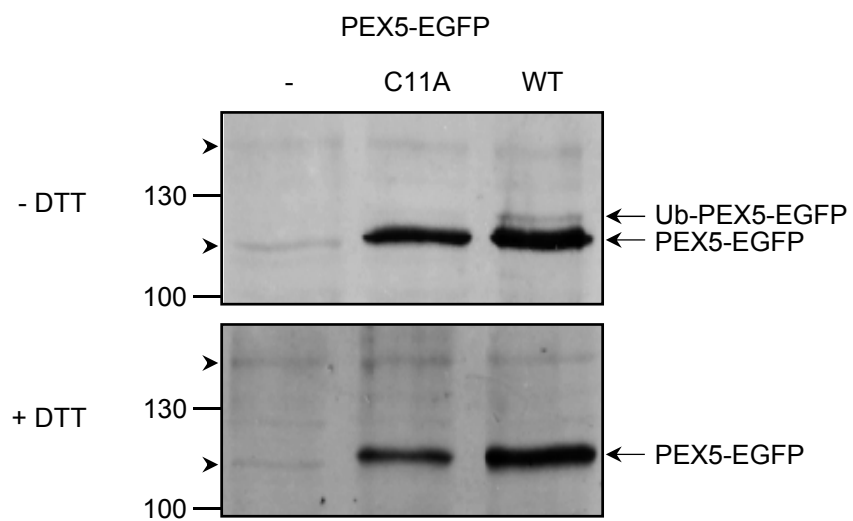

Supplement: Supplementary file 2 [file 8]

Figure S23

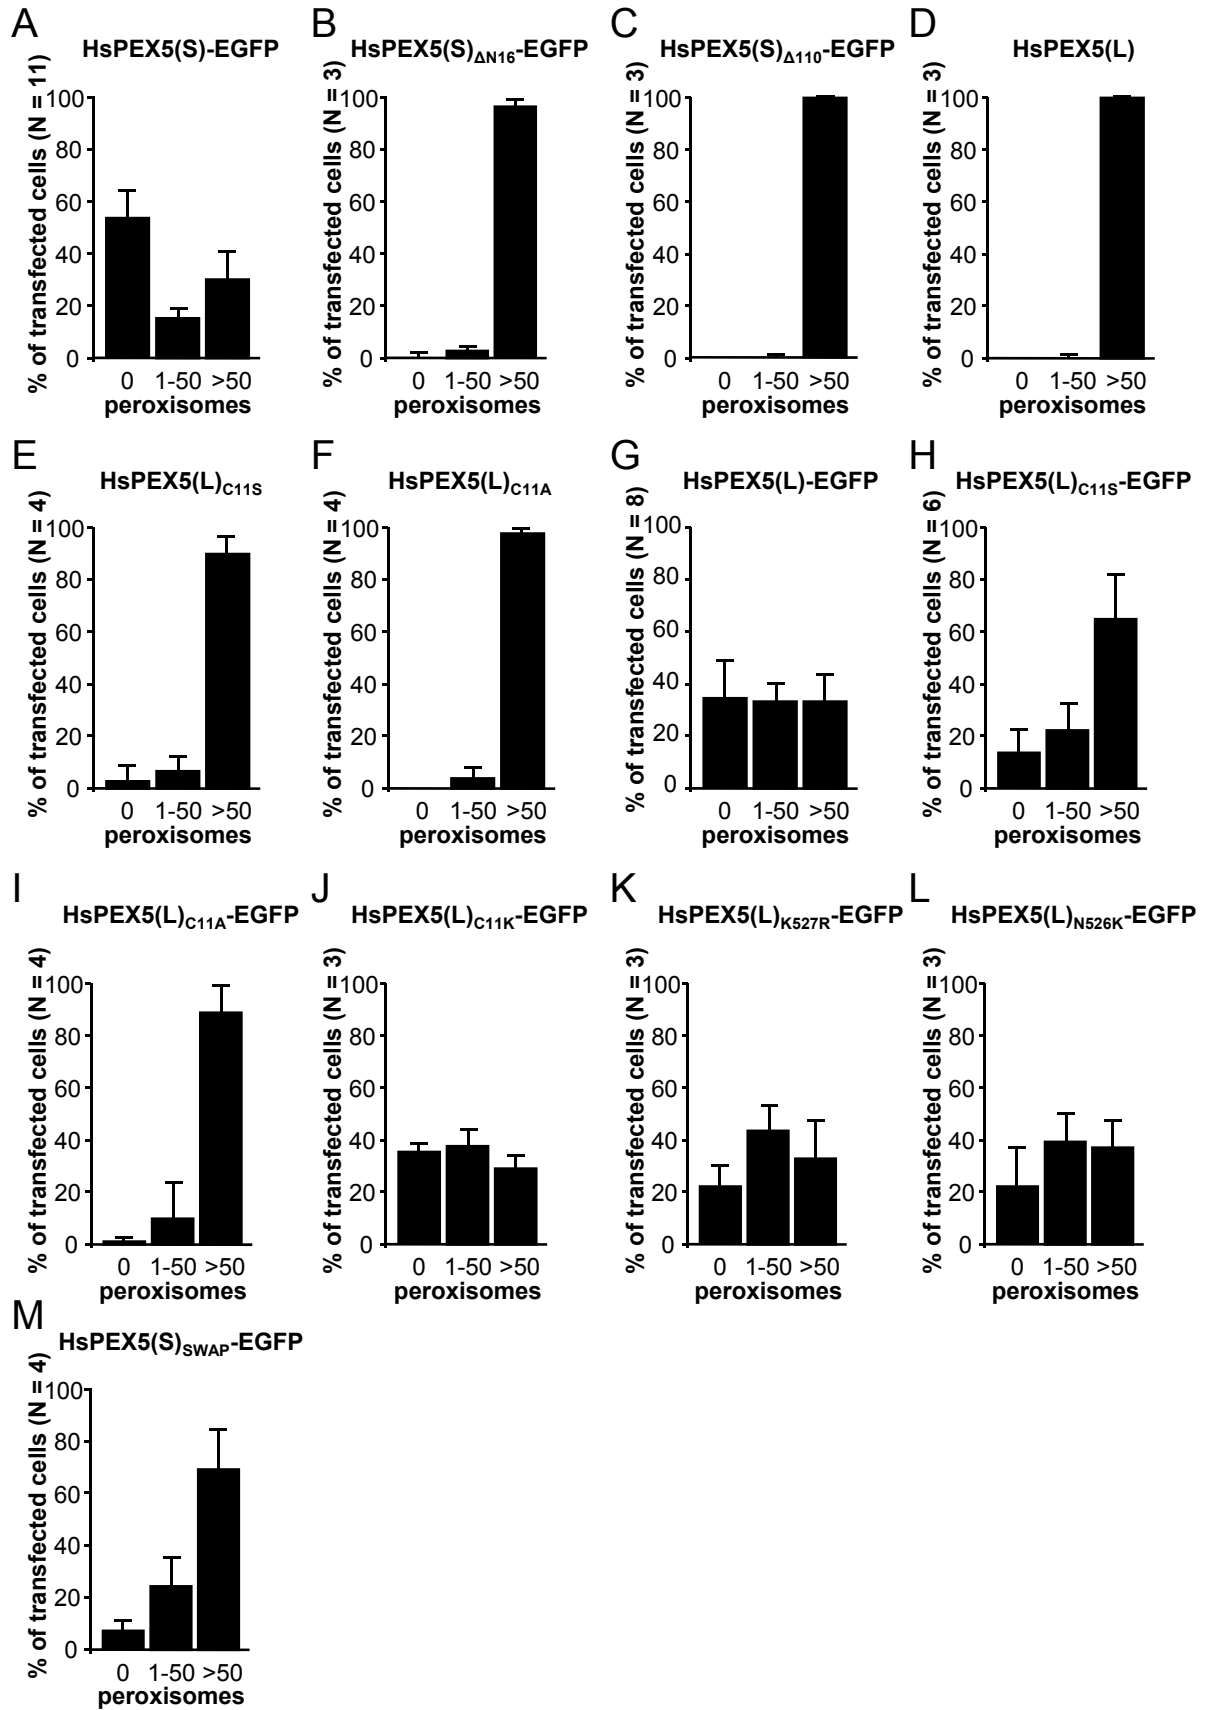

Supplement: Supplementary file 3 [file 8]

Figure S1

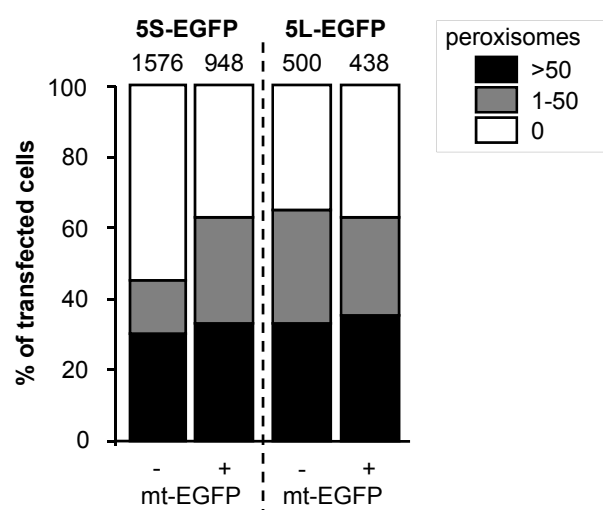

Supplement: Supplementary file 4 [file 8]

Figure S20

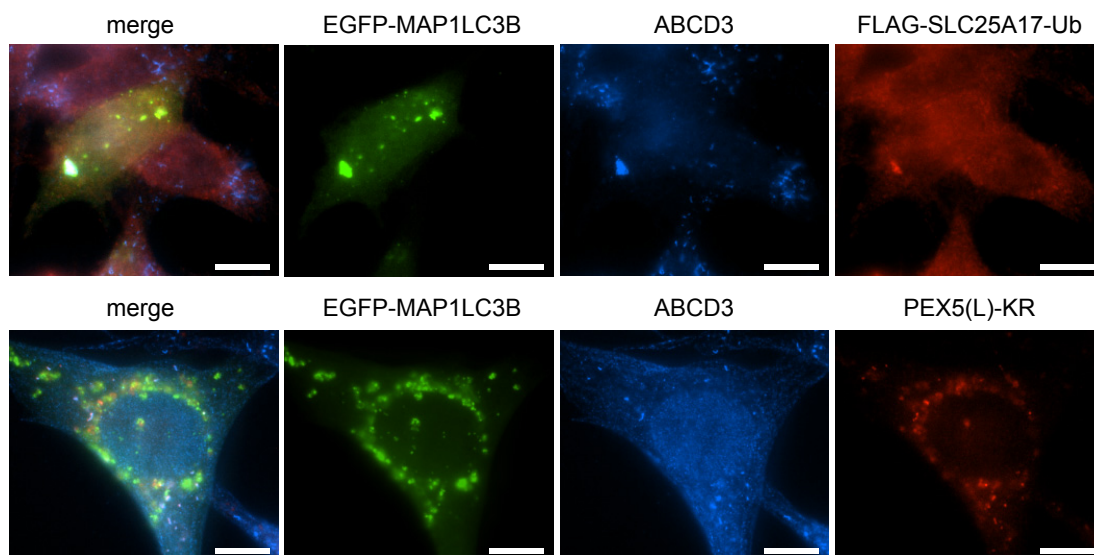

Supplement: Supplementary file 5 [file 8]

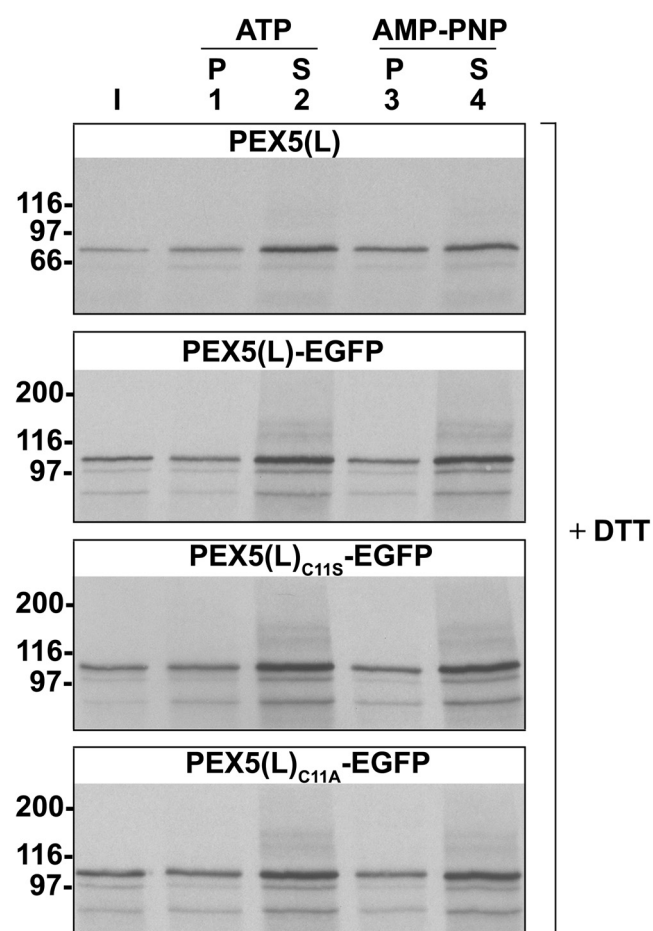

**Figure S12**

Supplement: Supplementary file 6 [file 8]

Figure S19

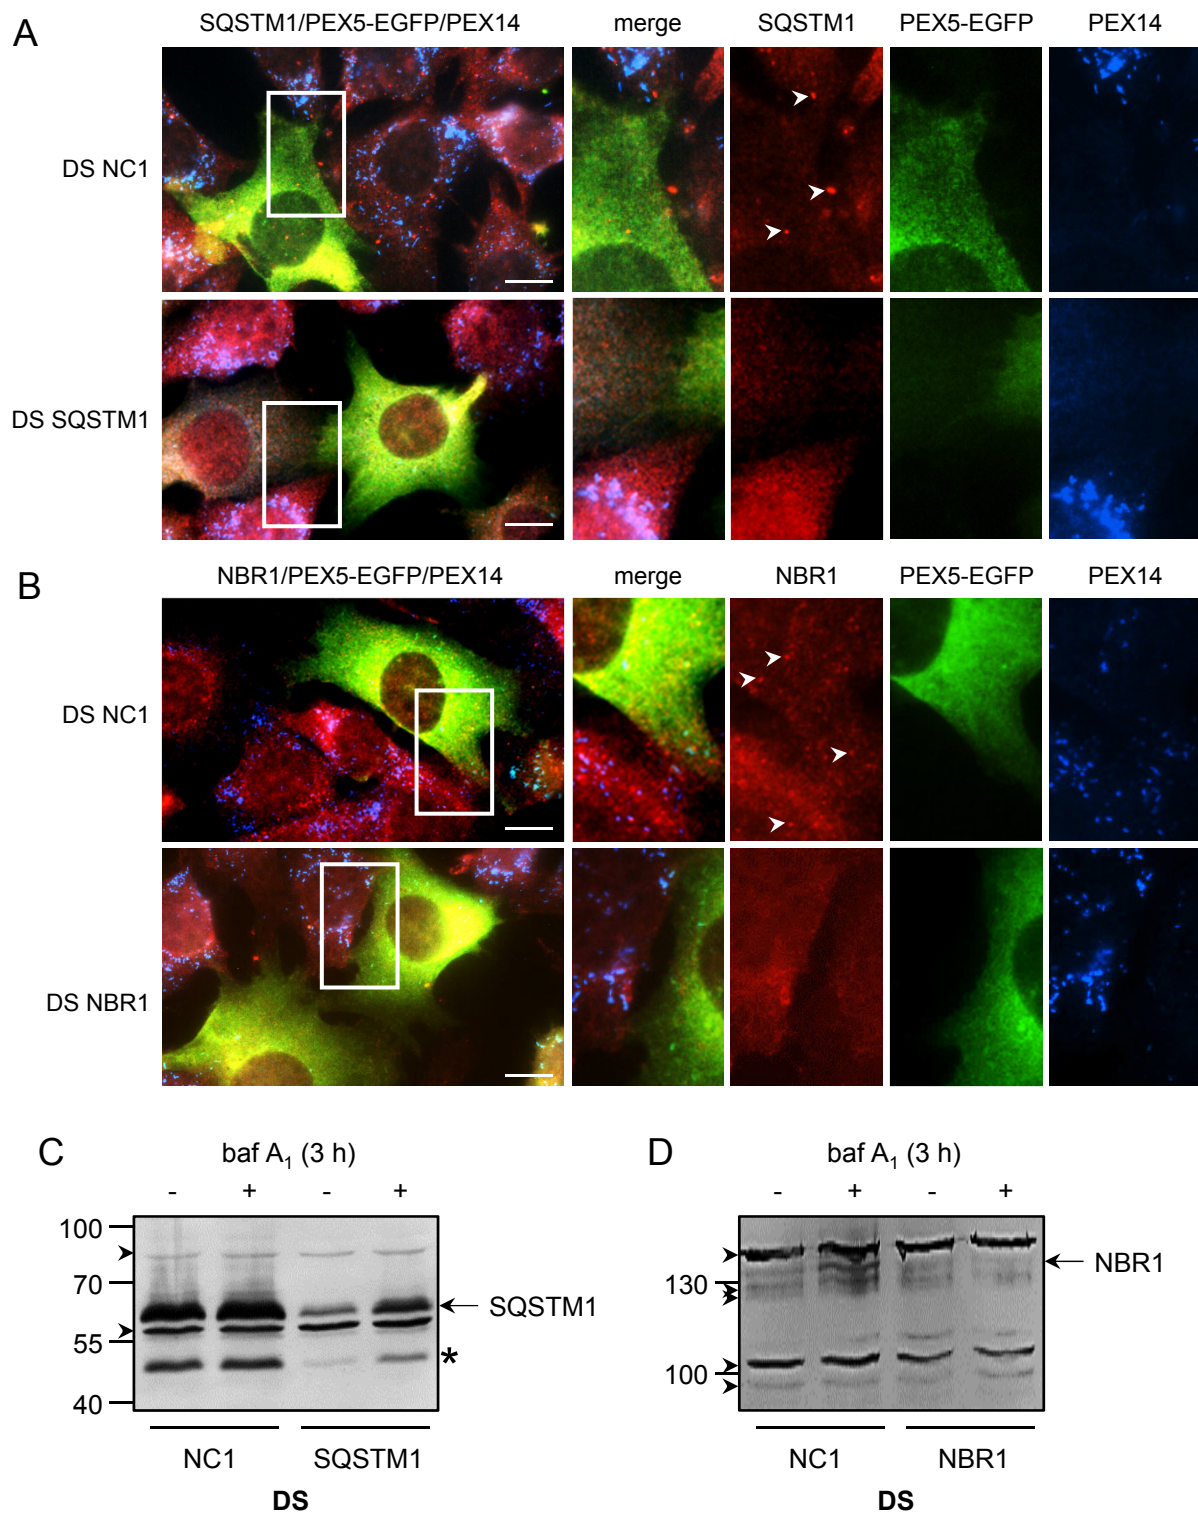

Supplement: Supplementary file 7 [file 8]

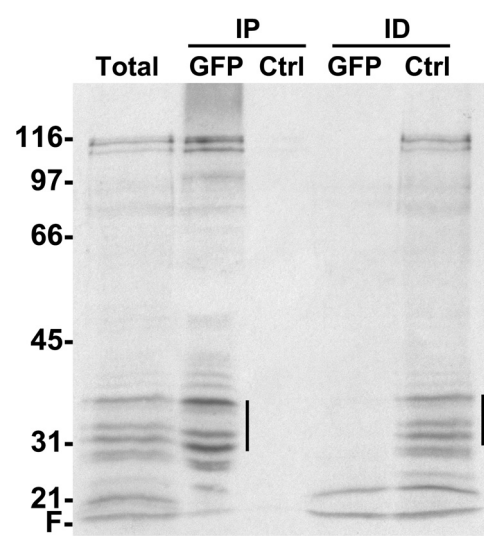

**Figure S13**

Supplement: Supplementary file 8 [file 8]

Figure S22

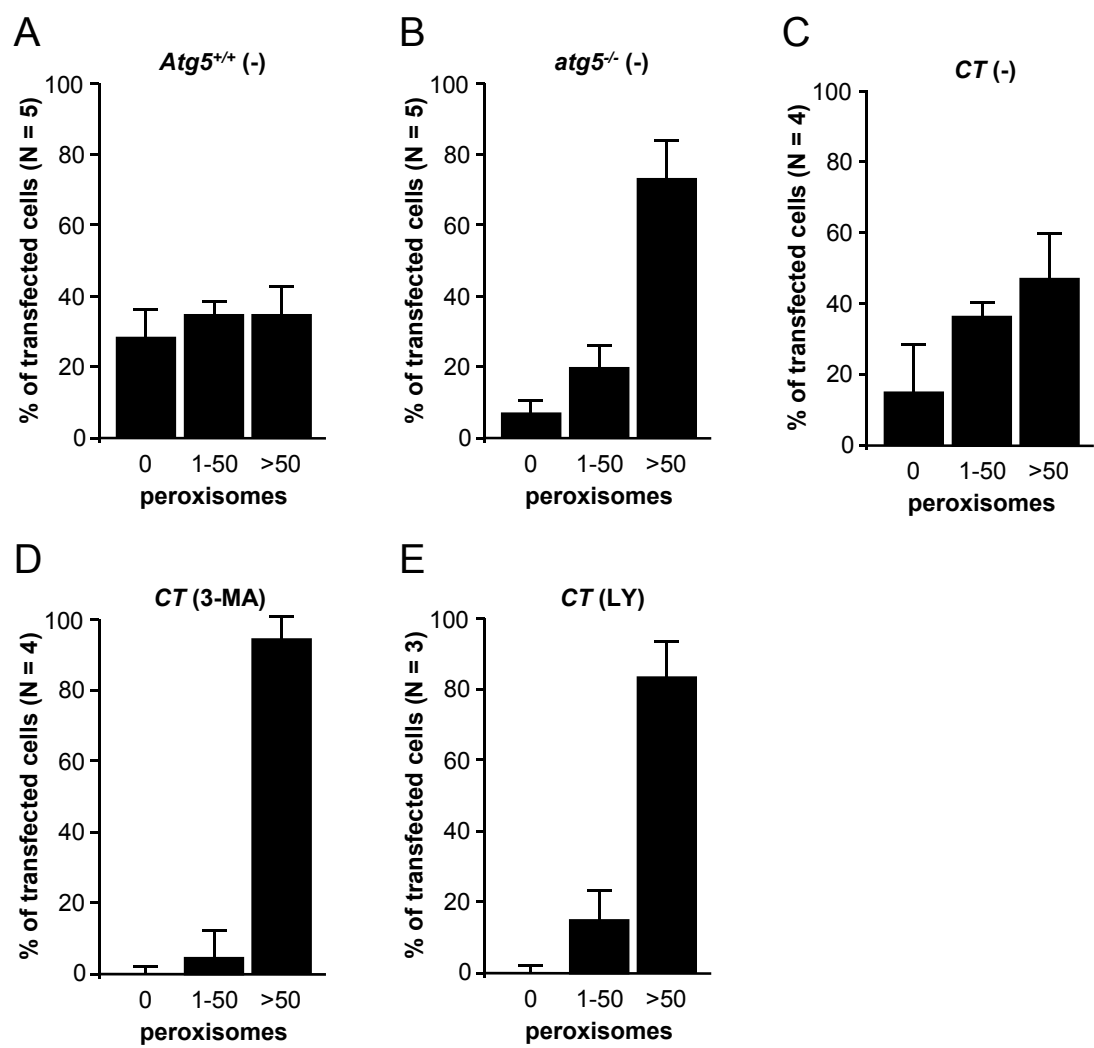

Supplement: Supplementary file 9 [file 8]

Figure S7

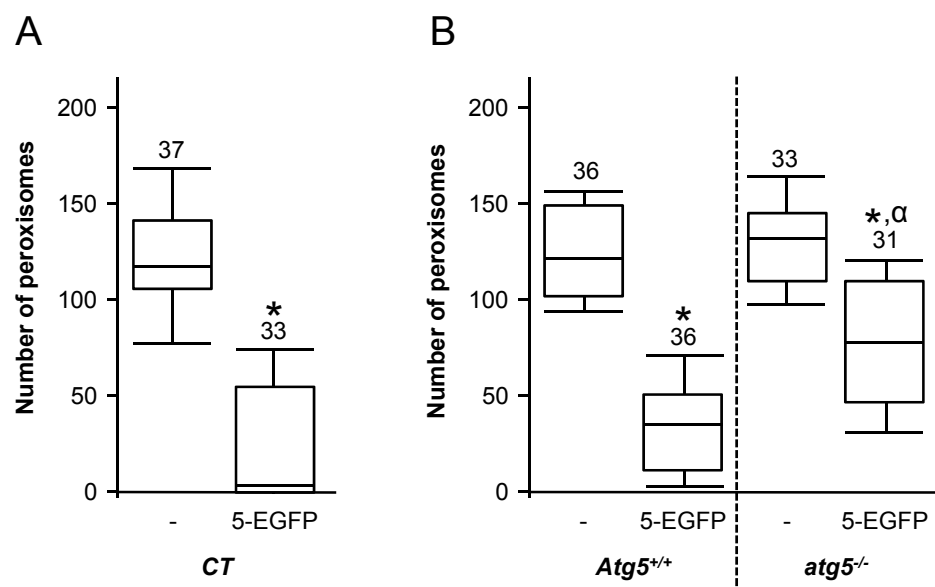

Supplement: Supplementary file 10 [file 8]

Figure S4

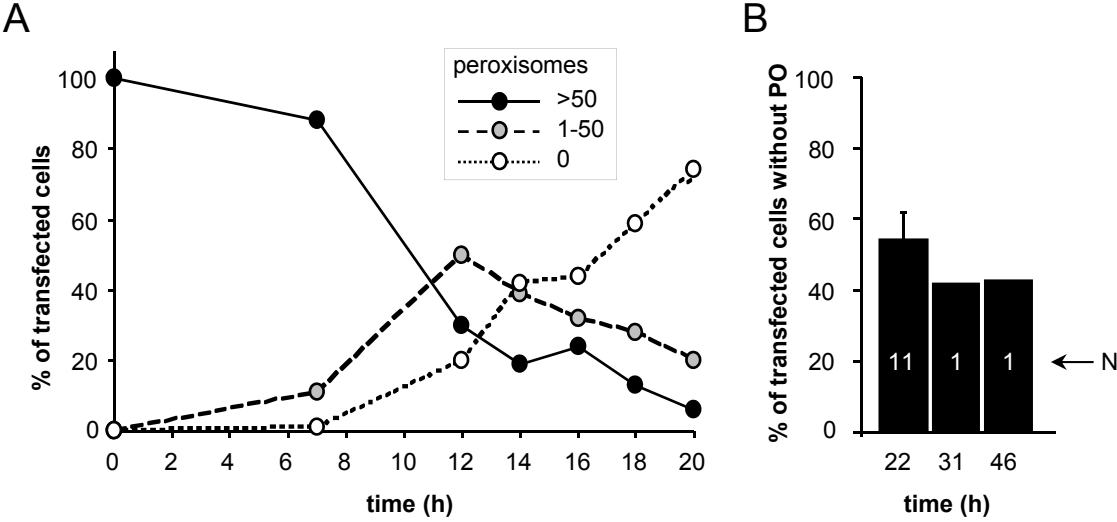

Supplement: Supplementary file 11 [file 8]

Figure S3

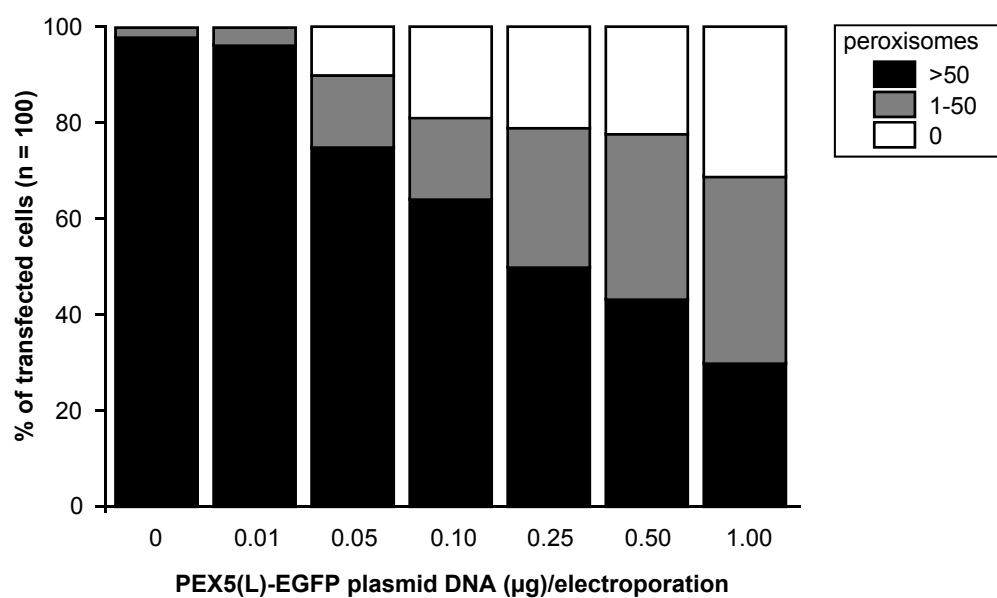

Supplement: Supplementary file 12 [file 8]

Figure S21

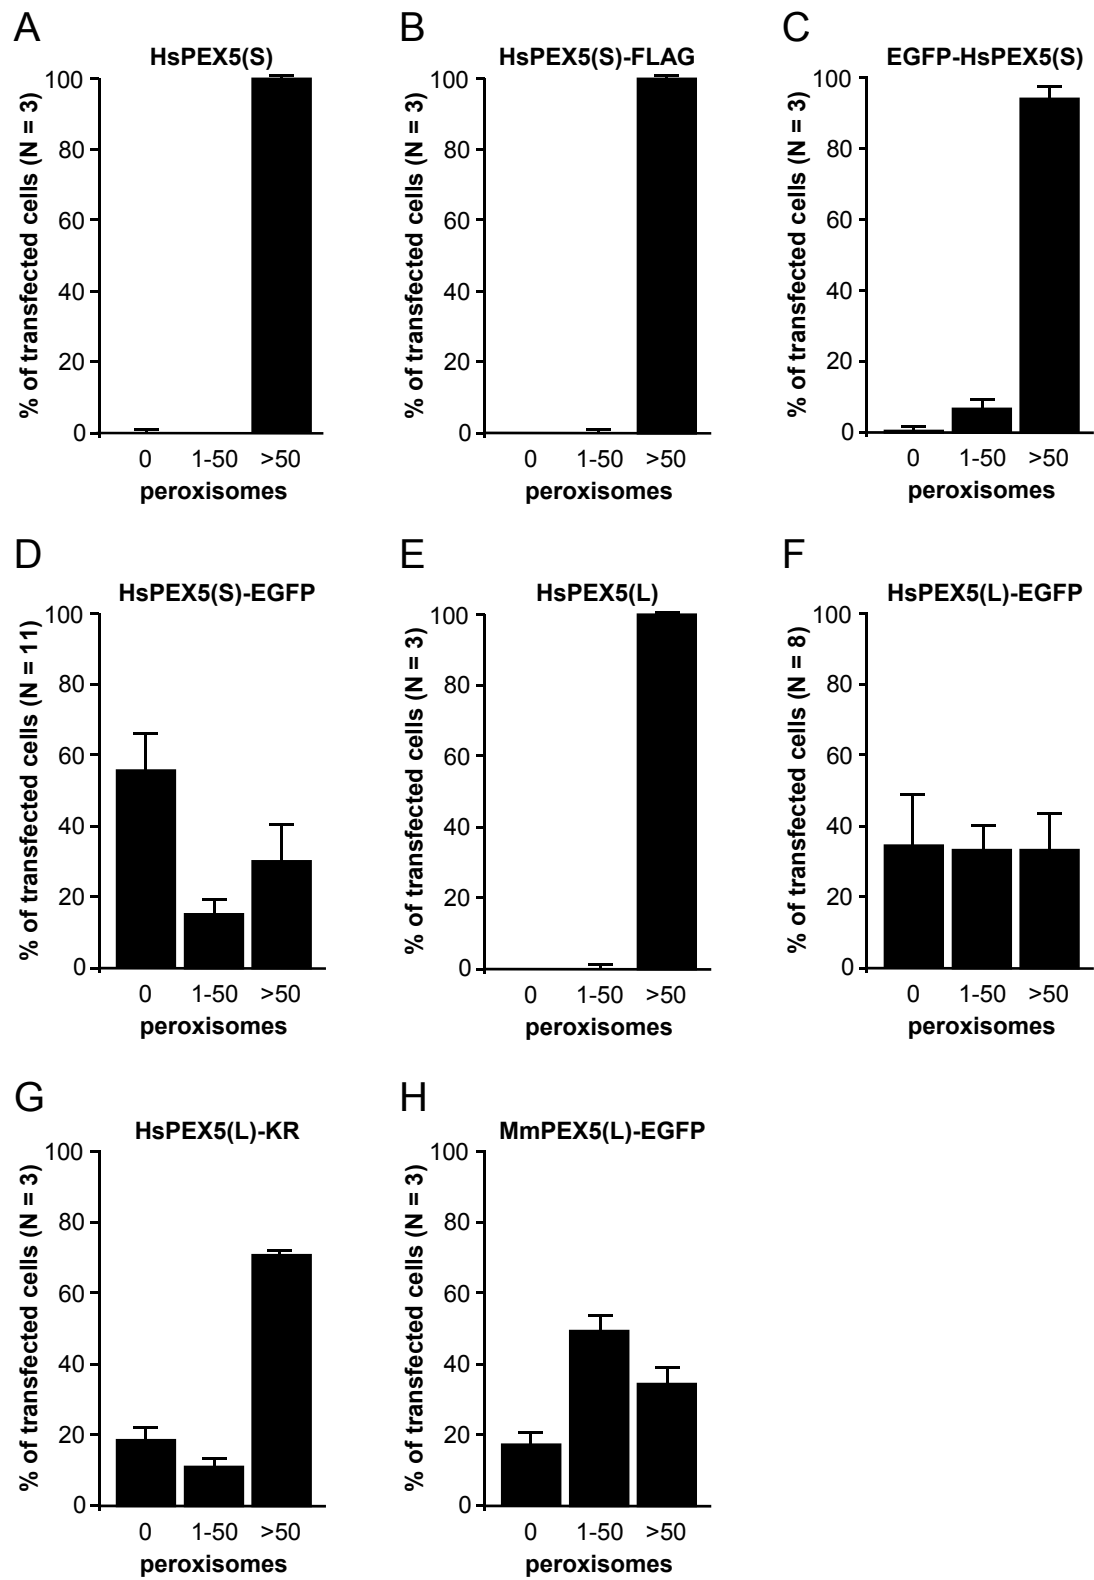

Supplement: Supplementary file 13 [file 8]

Figure S5

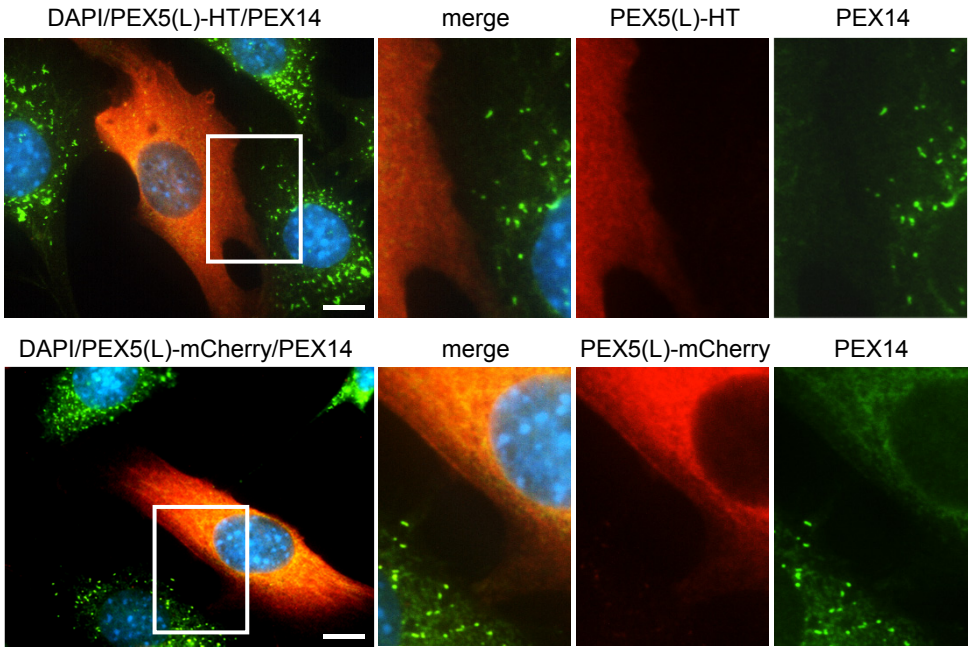

Supplement: Supplementary file 14 [file 8]

Figure S18

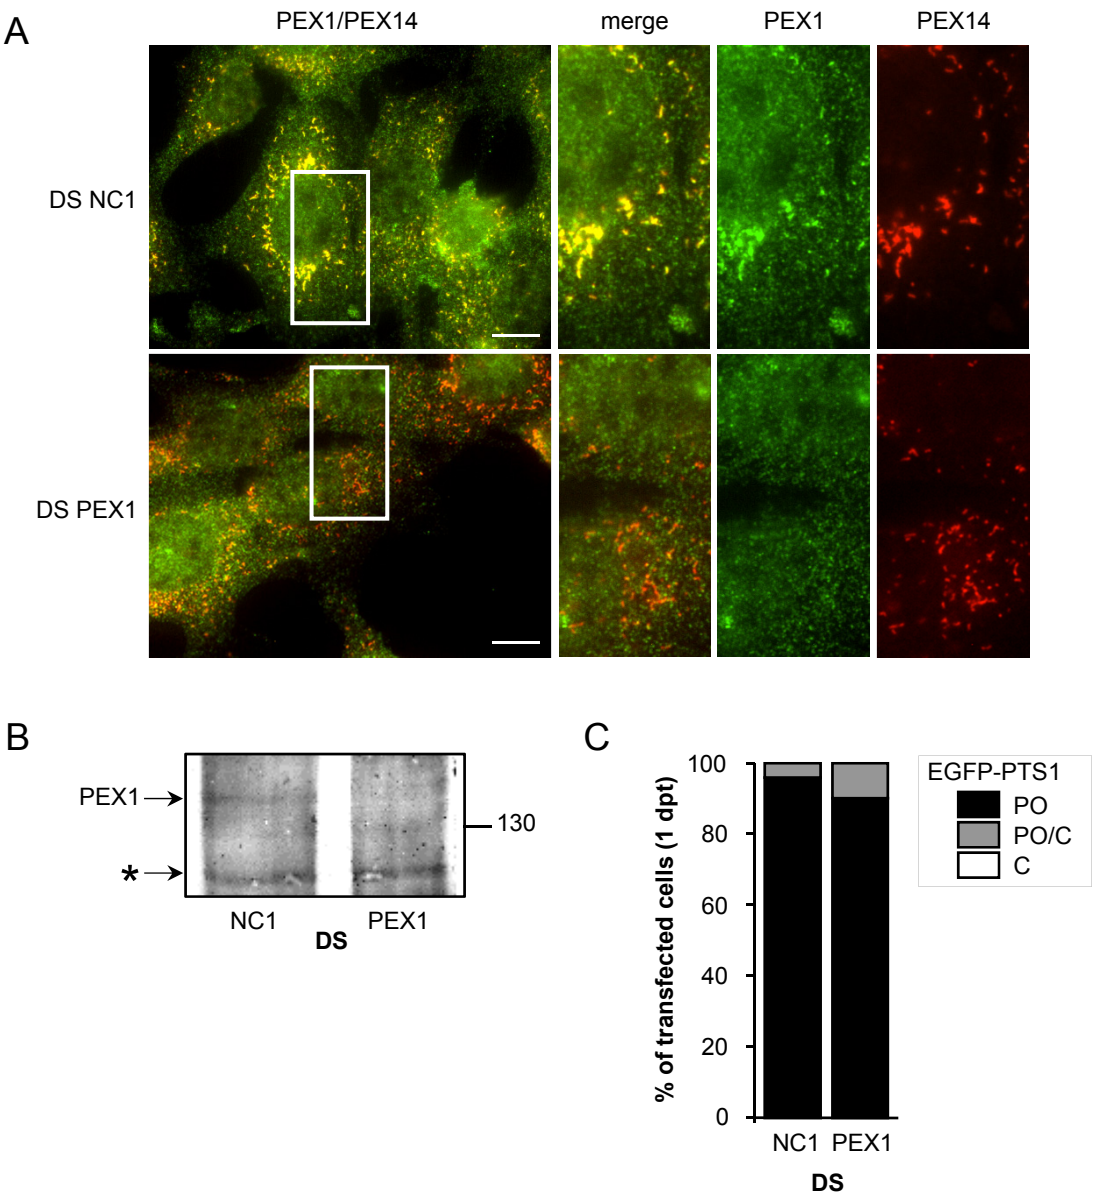

Supplement: Supplementary file 15 [file 8]

Figure S8

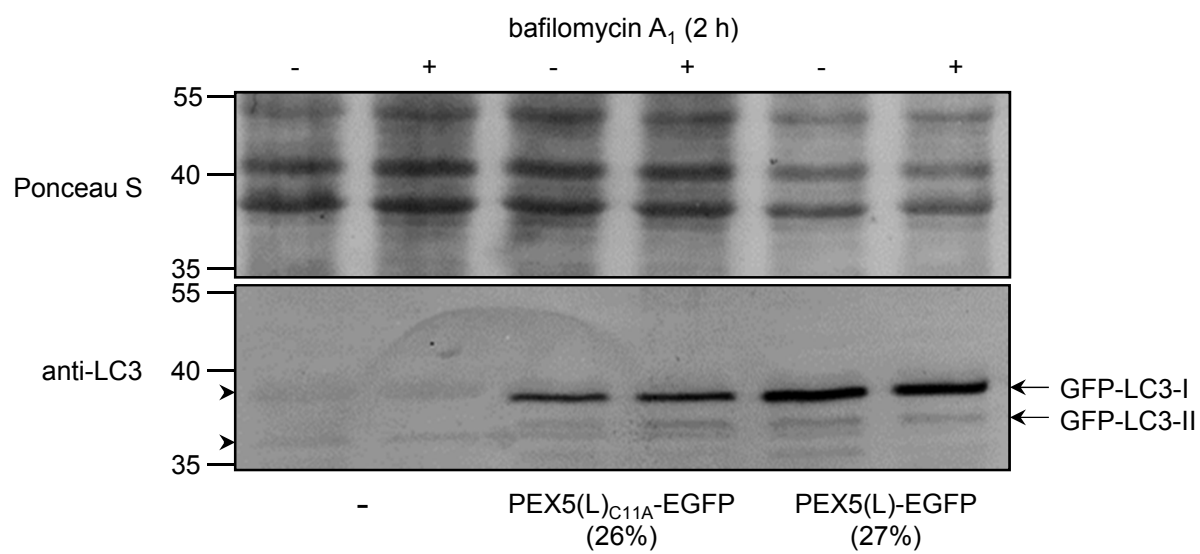

Supplement: Supplementary file 16 [file 8]

Figure S24

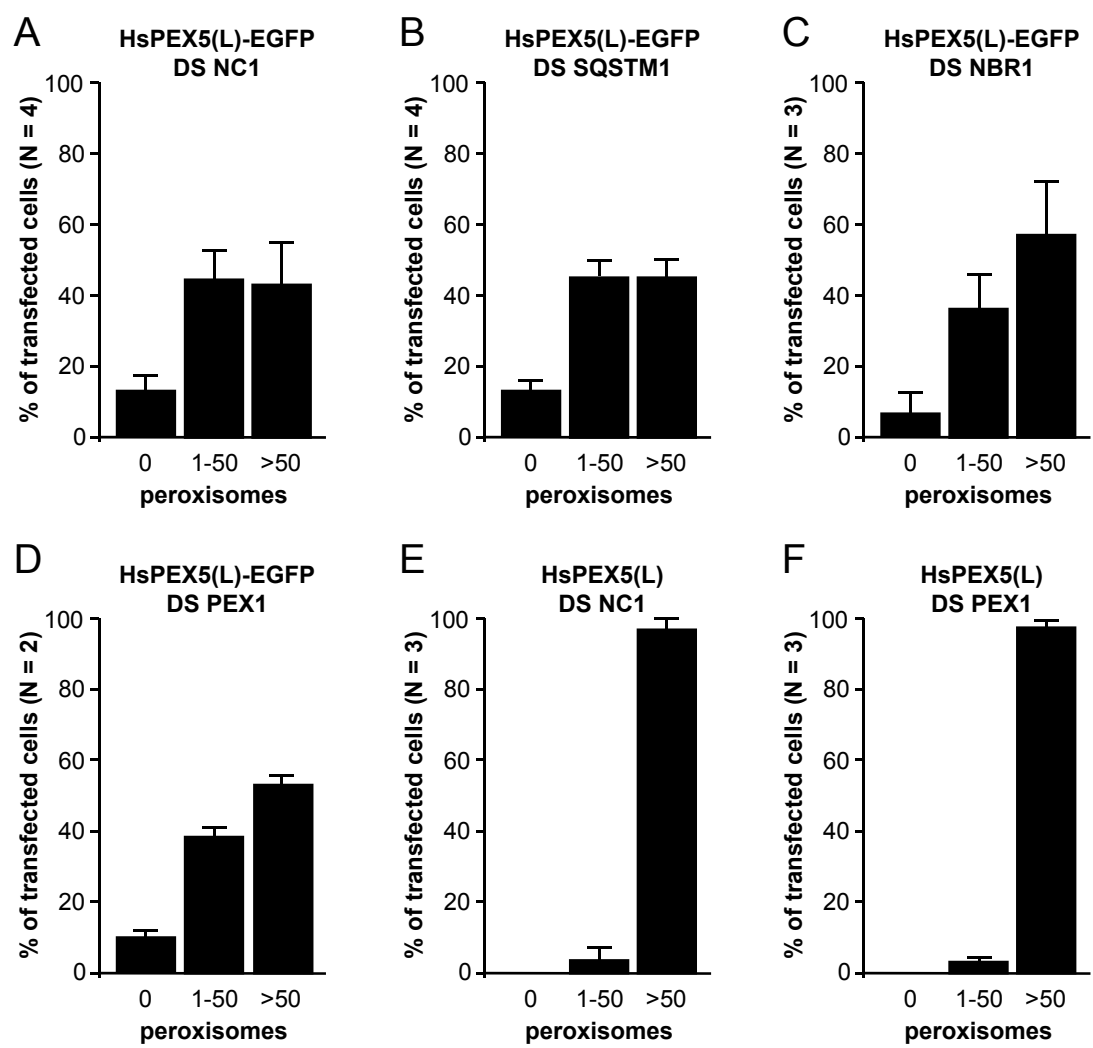

Supplement: Supplementary file 17 [file 8]

Figure S11

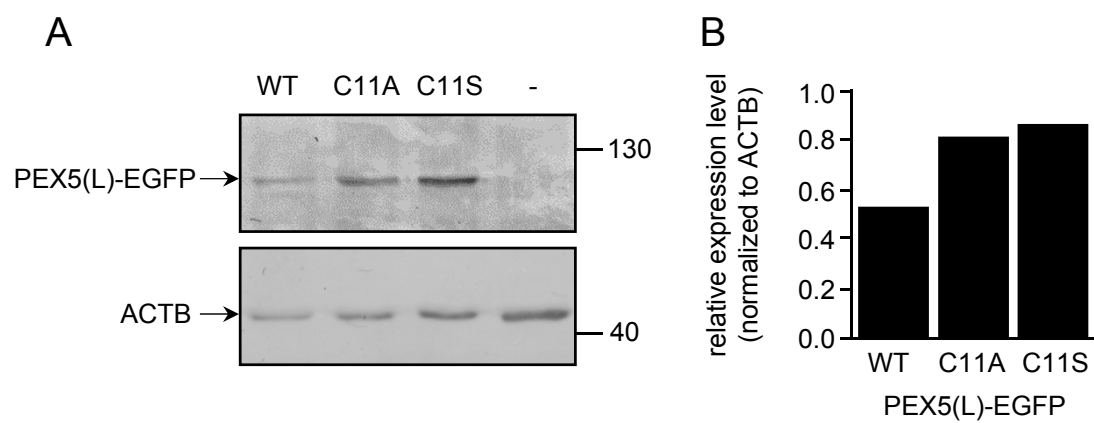

Supplement: Supplementary file 18 [file 8]

Figure S17

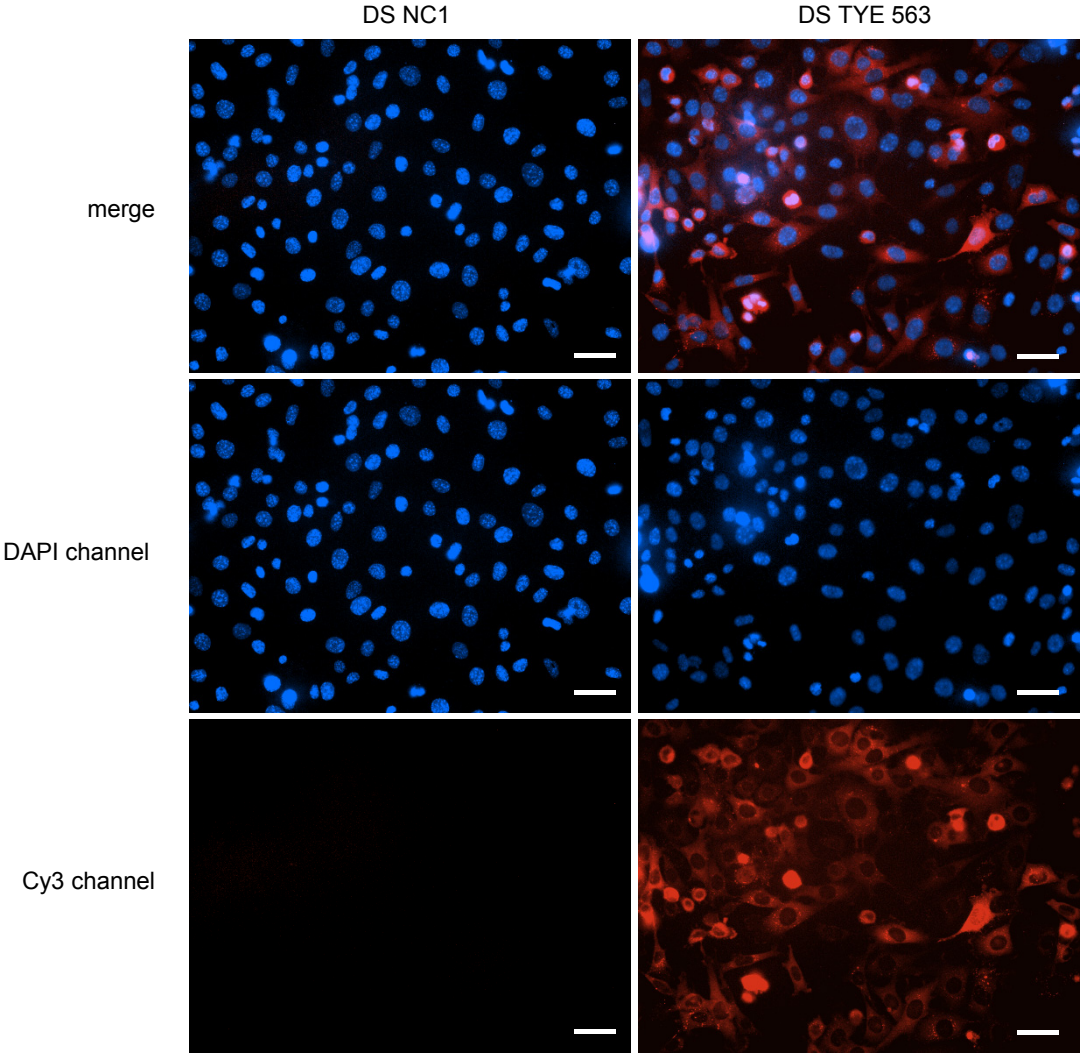

Supplement: Supplementary file 19 [file 8]

Figure S2

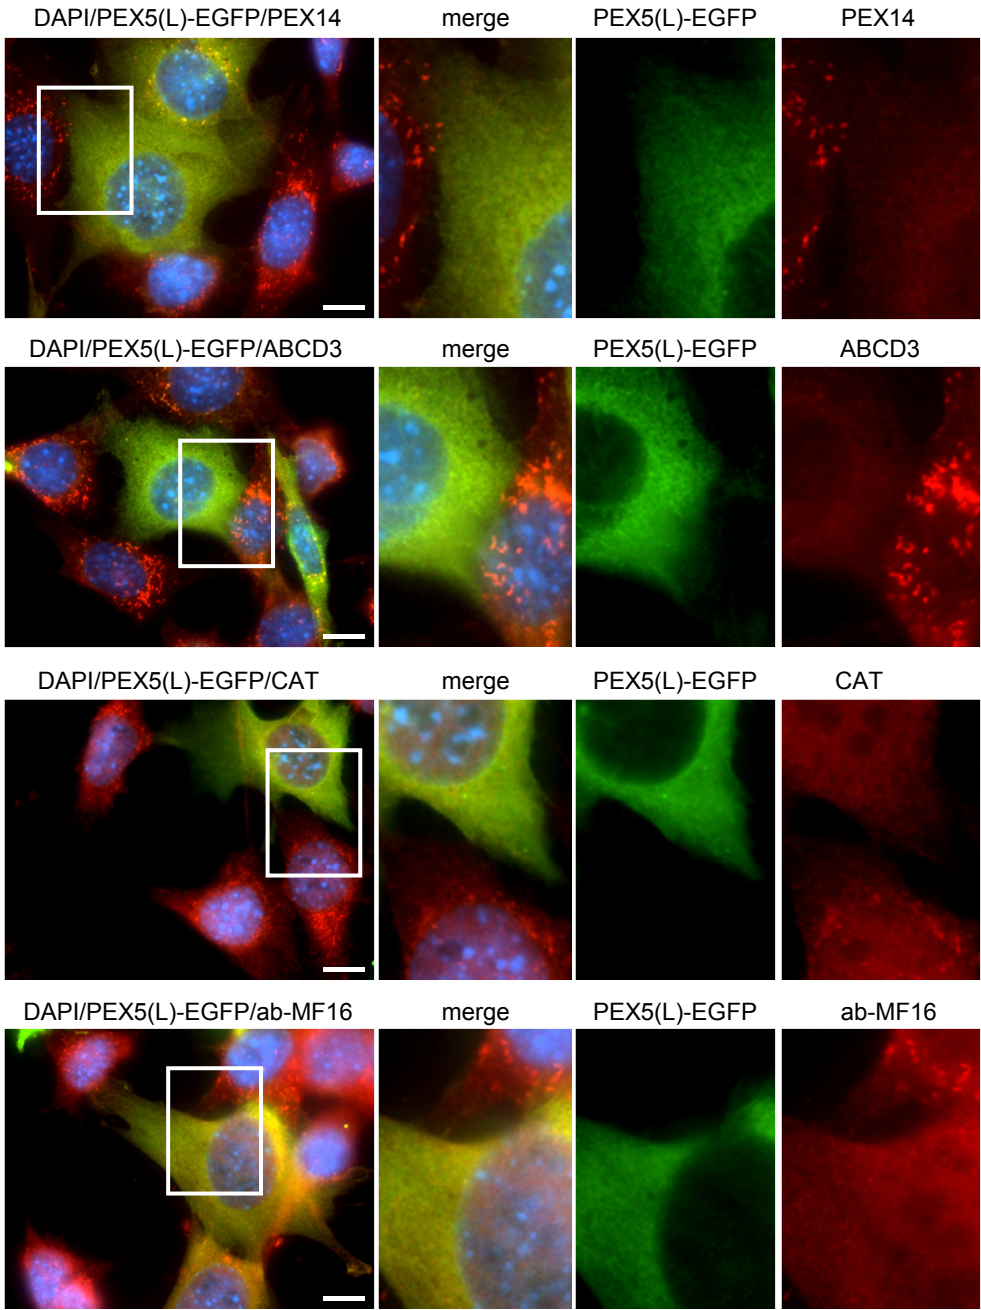

Supplement: Supplementary file 20 [file 8]

Figure S10

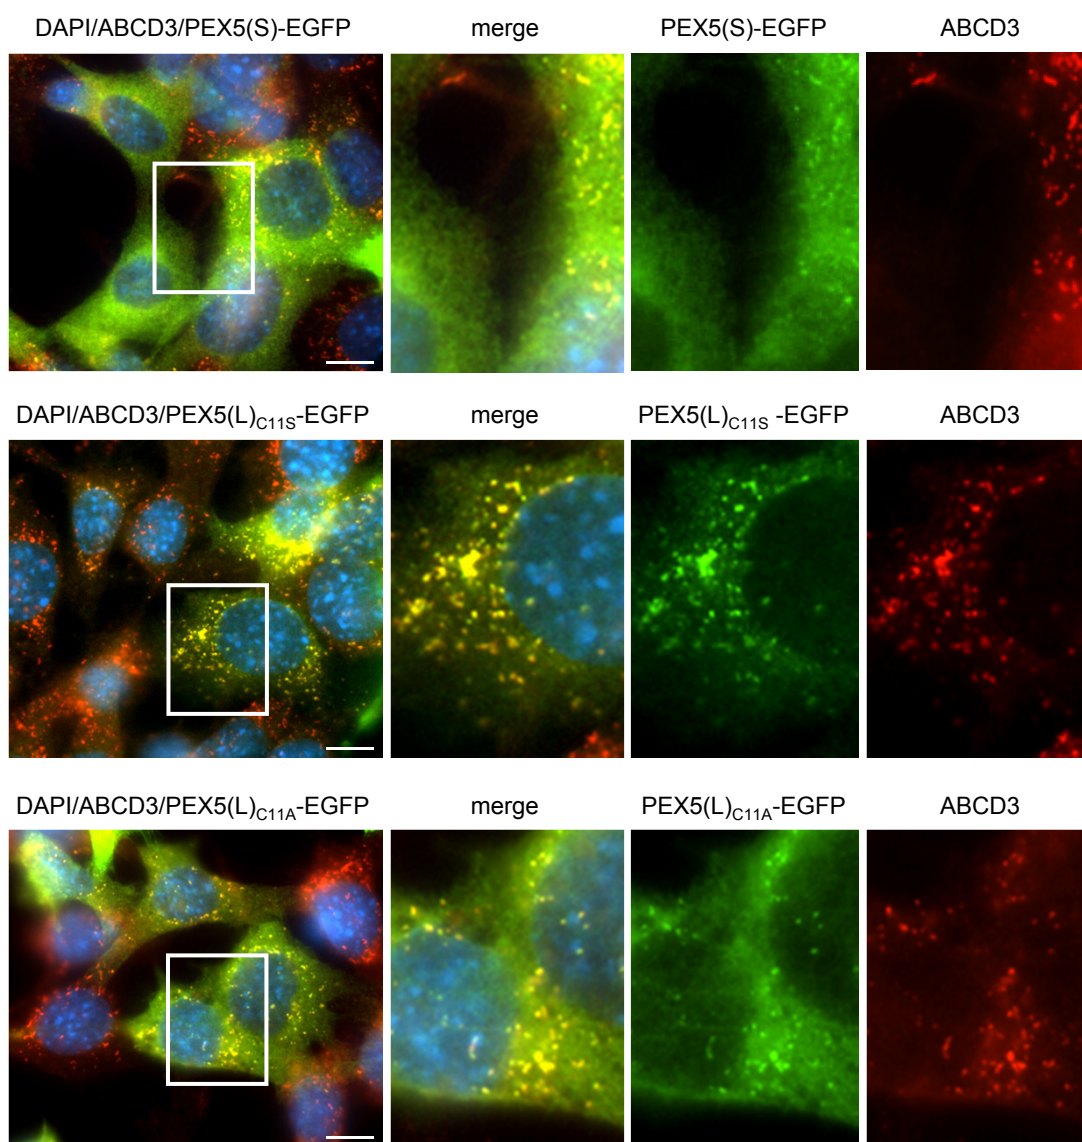

Supplement: Supplementary file 21 [file 8]

Figure S16

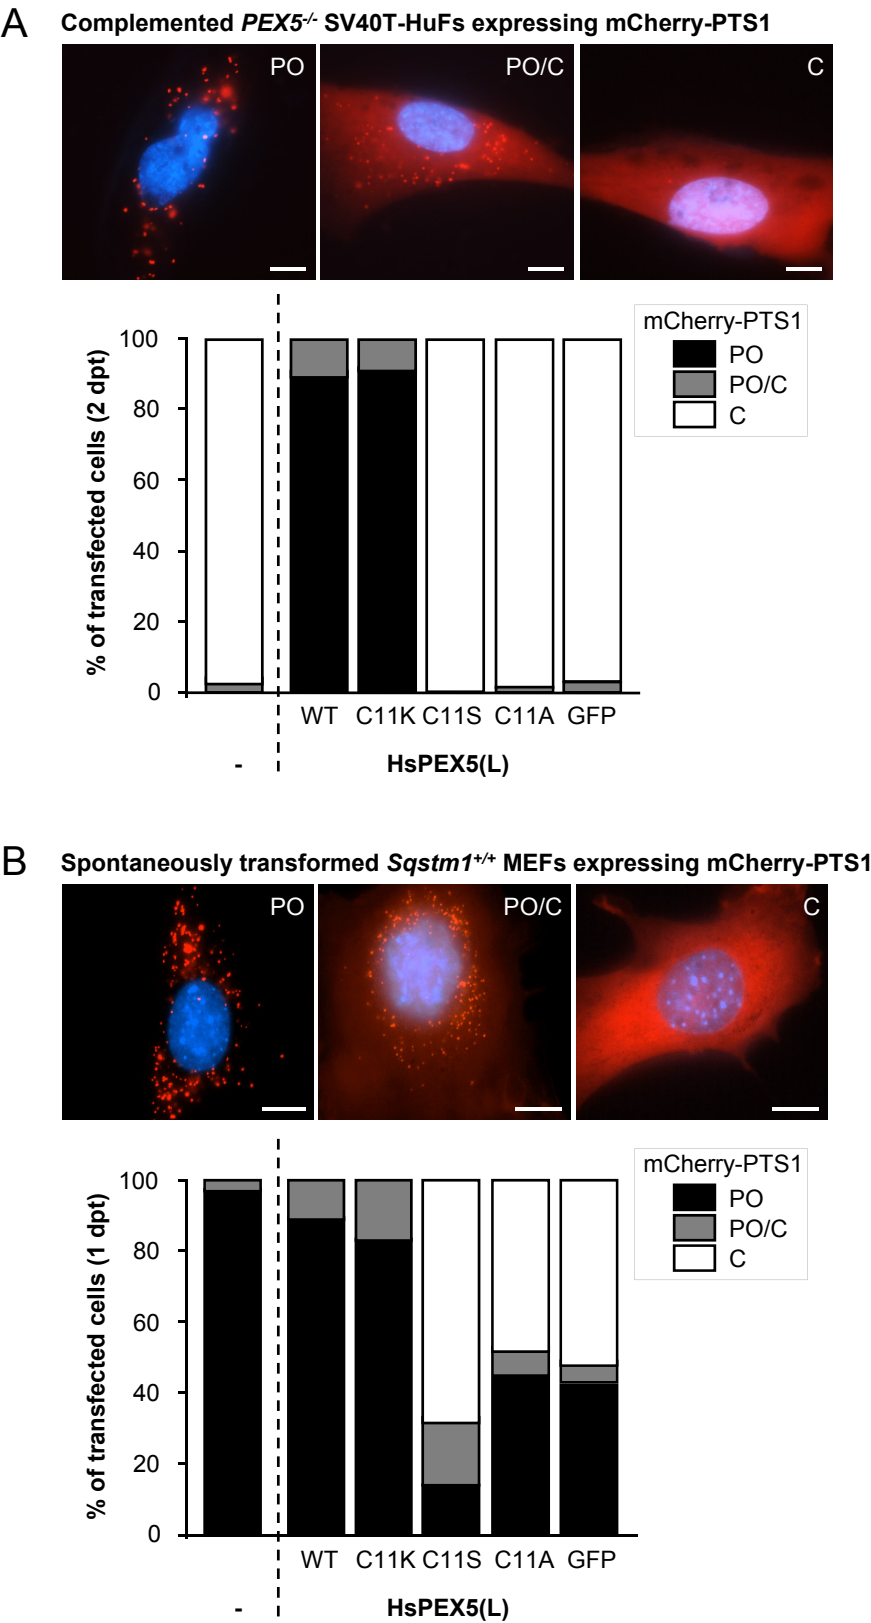

Supplement: Supplementary file 22 [file 8]

Figure S15

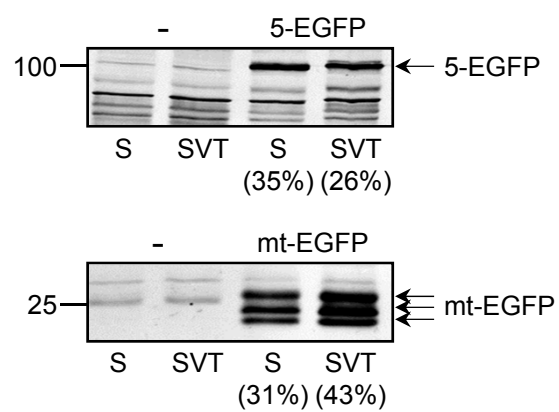

Supplement: Supplementary file 23 [file 8]

Figure S6

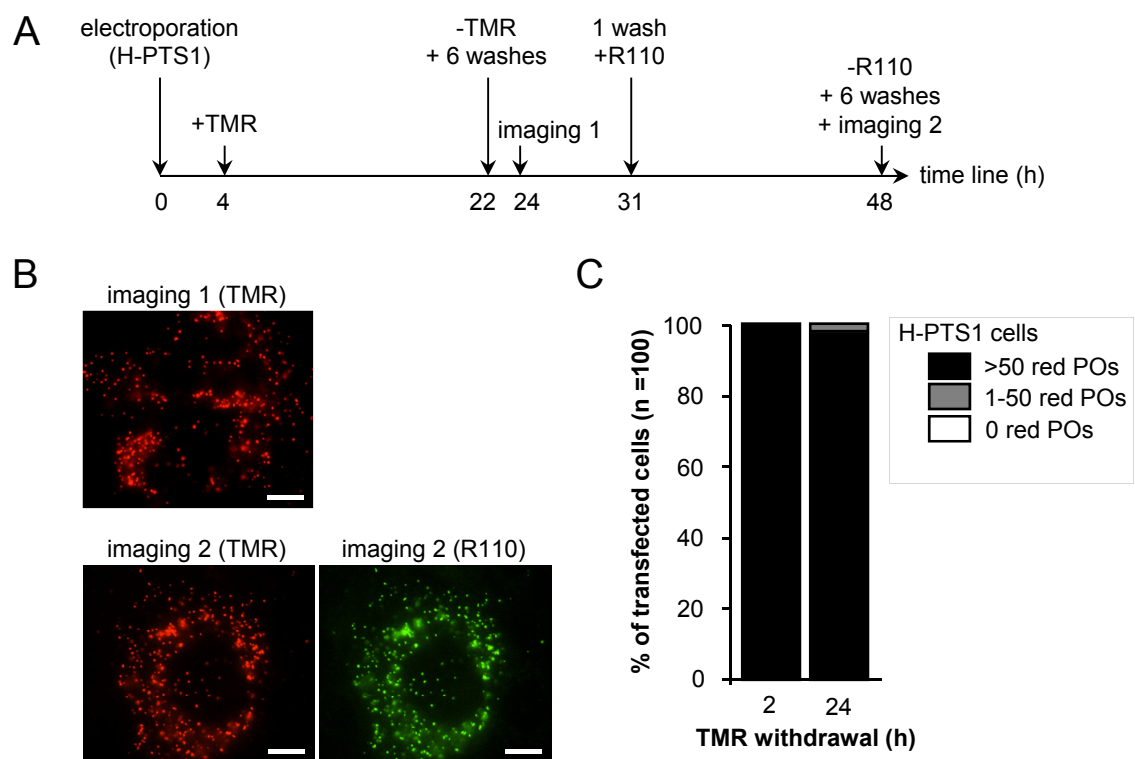

Supplement: Supplementary file 24 [file 8]
